# Supplementary material for: Constituents of the Stem Bark of Trichilia monadelpha (Thonn.) J. J. De Wilde (Meliaceae) and Their Antibacterial and Antiplasmodial Activities
Source: MDPI journal article supplement (doi:10.3390/metabo13020298), 2023-02-17
Supplement: s1 [file s1]

## Supplementary material

### Constituents of the stems bark of *Trichilia monadelpha* and their antibacterial and antiplasmodial activities

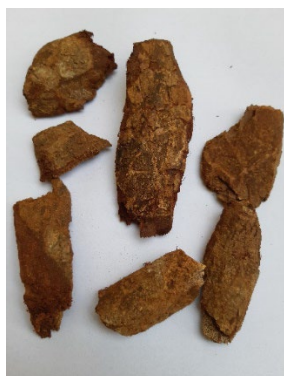

#### Contents of supplementary material

**Figure S1.**  $^1\text{H}$  NMR spectrum of compound 1

**Figure S2.**  $^{13}\text{C}$  NMR spectrum of compound 1

**Figure S3.** DEPT  $135^\circ$  spectra of compound 1

**Figure S4.** HMBC spectrum of compound 1

**Figure S5.** HSQC spectrum of compound 1

**Figure S6.**  $^1\text{H}$ - $^1\text{H}$  COSY spectrum of compound 1

**Figure S7.**  $^1\text{H}$ - $^1\text{H}$  NOESY spectrum of compound 1

**Figure S8.** HRESIMS spectrum of  $[\text{M}+\text{Na}]^+$  ion of compound 1

**Figure S9.**  $^1\text{H}$  NMR spectrum of compound 2

**Figure S10.**  $^{13}\text{C}$  NMR spectrum of compound 2

**Figure S11.** DEPT  $135^\circ$  spectra of compound 2

**Figure S12.** HMBC spectrum of compound 2

**Figure S13.** HSQC spectrum of compound 2

**Figure S14.**  $^1\text{H}$ - $^1\text{H}$  COSY spectrum of compound 2

**Figure S15.** NOESY spectrum of compound 2

**Figure S16.** HRESIMS spectrum of  $[\text{M}+\text{H}]^+$  ion of compound 2

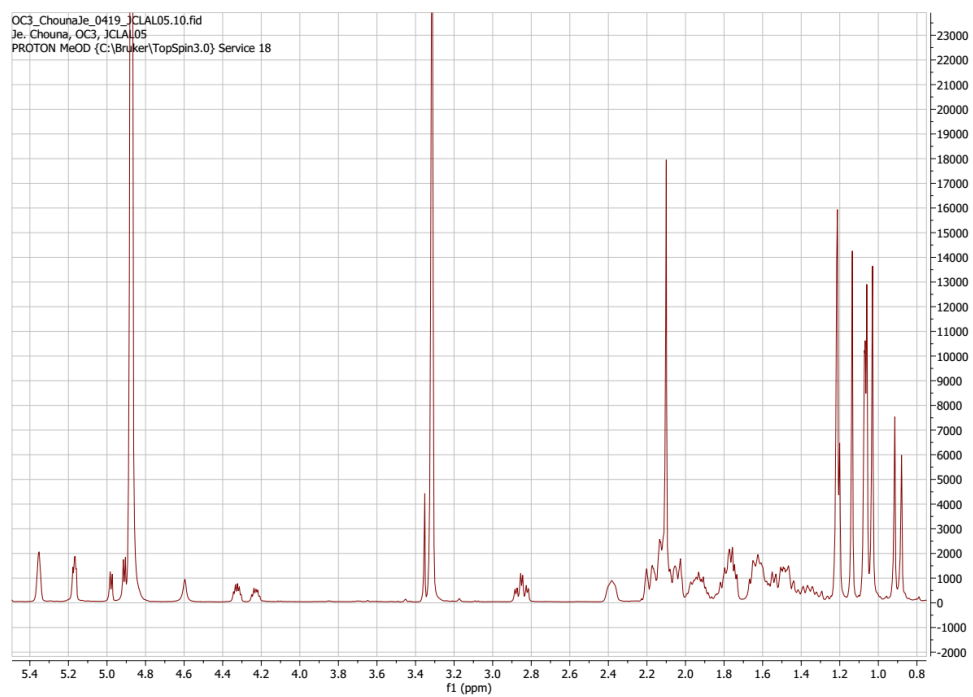

**Figure S1.**  $^1\text{H}$  NMR spectrum of compound **1**

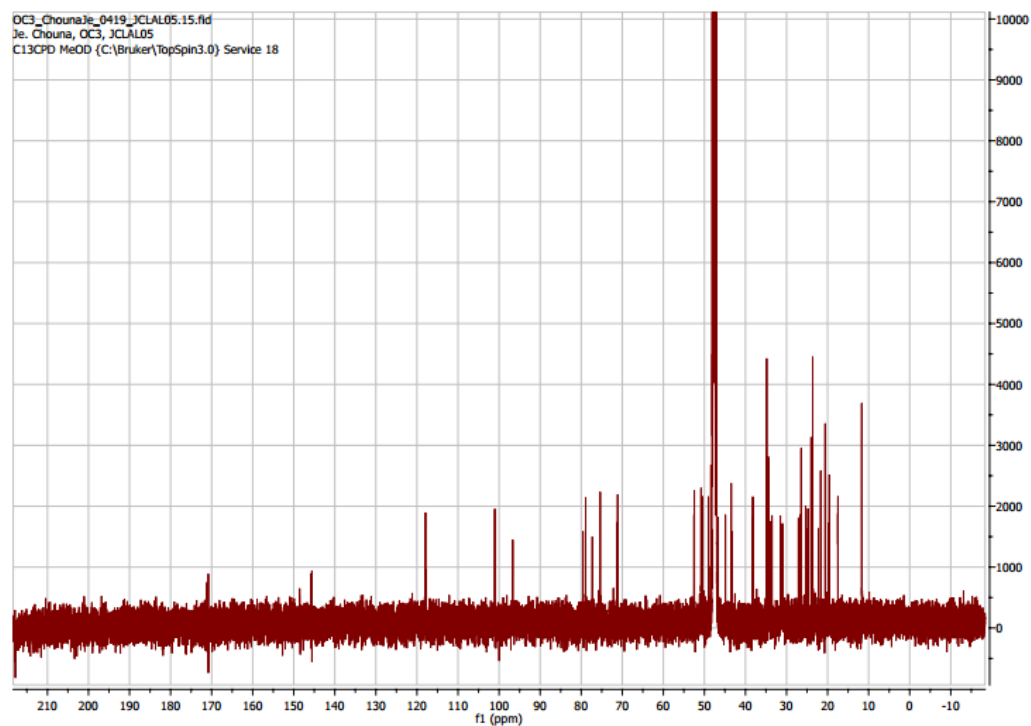

**Figure S2.**  $^{13}\text{C}$  NMR spectrum of compound **1**

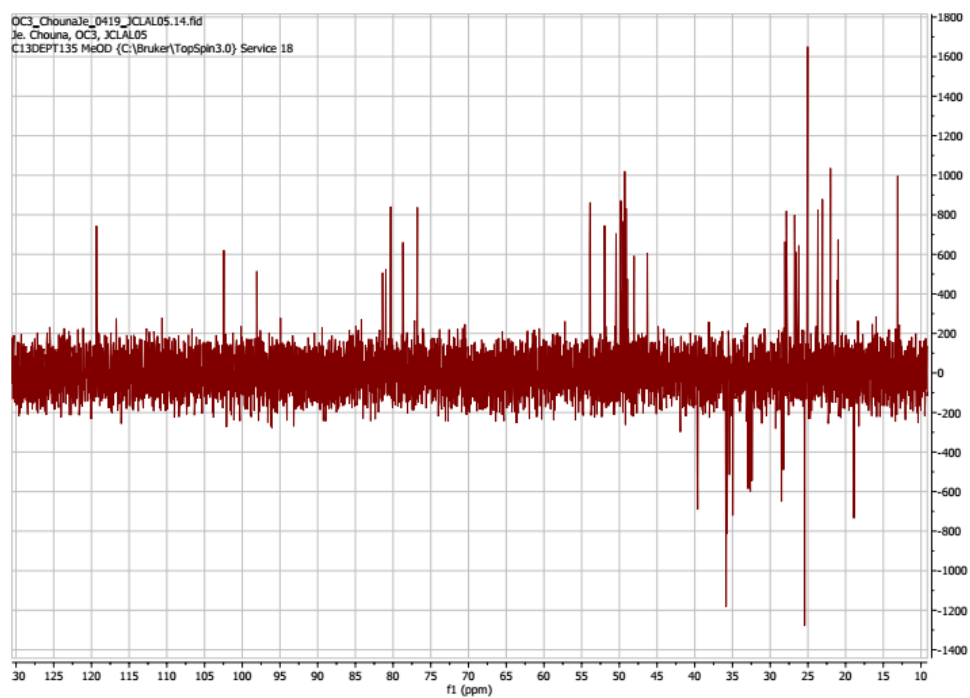

**Figure S3.** DEPT 135° spectra of compound **1**

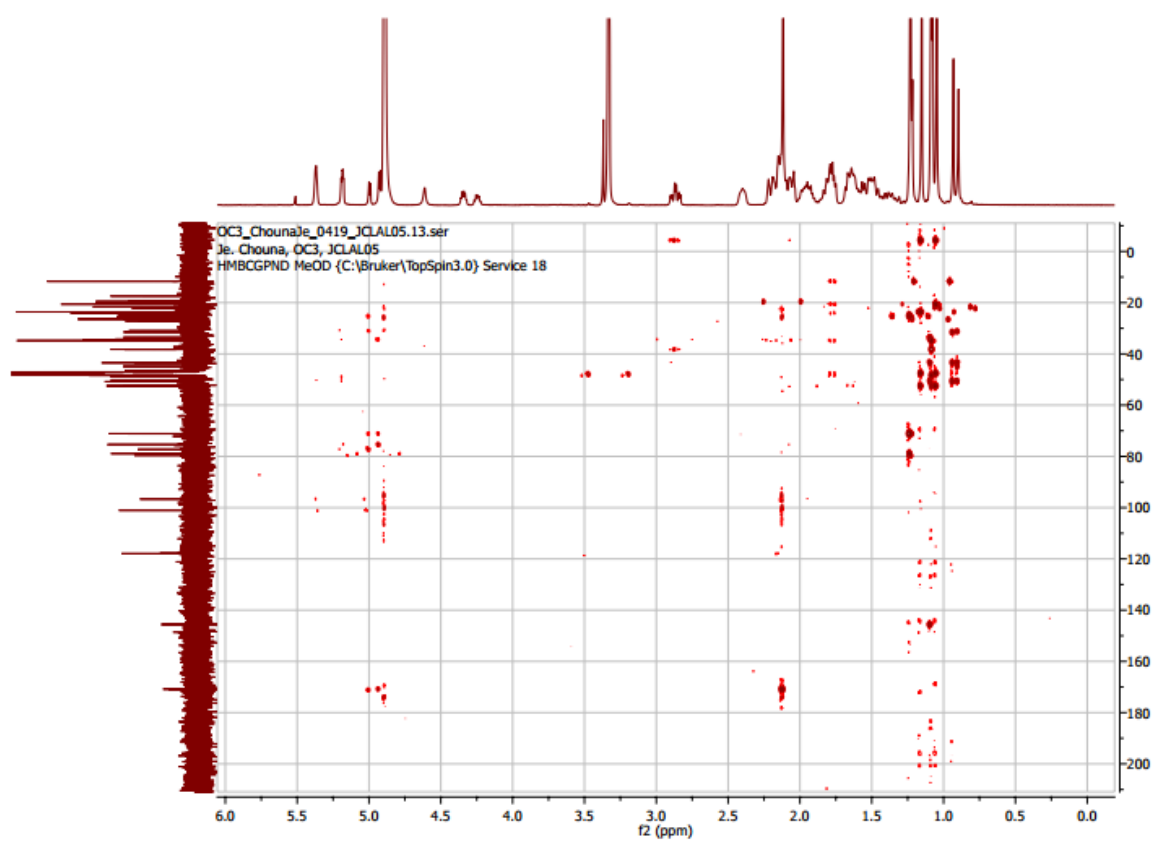

**Figure S4.** HMBC spectrum of compound **1**

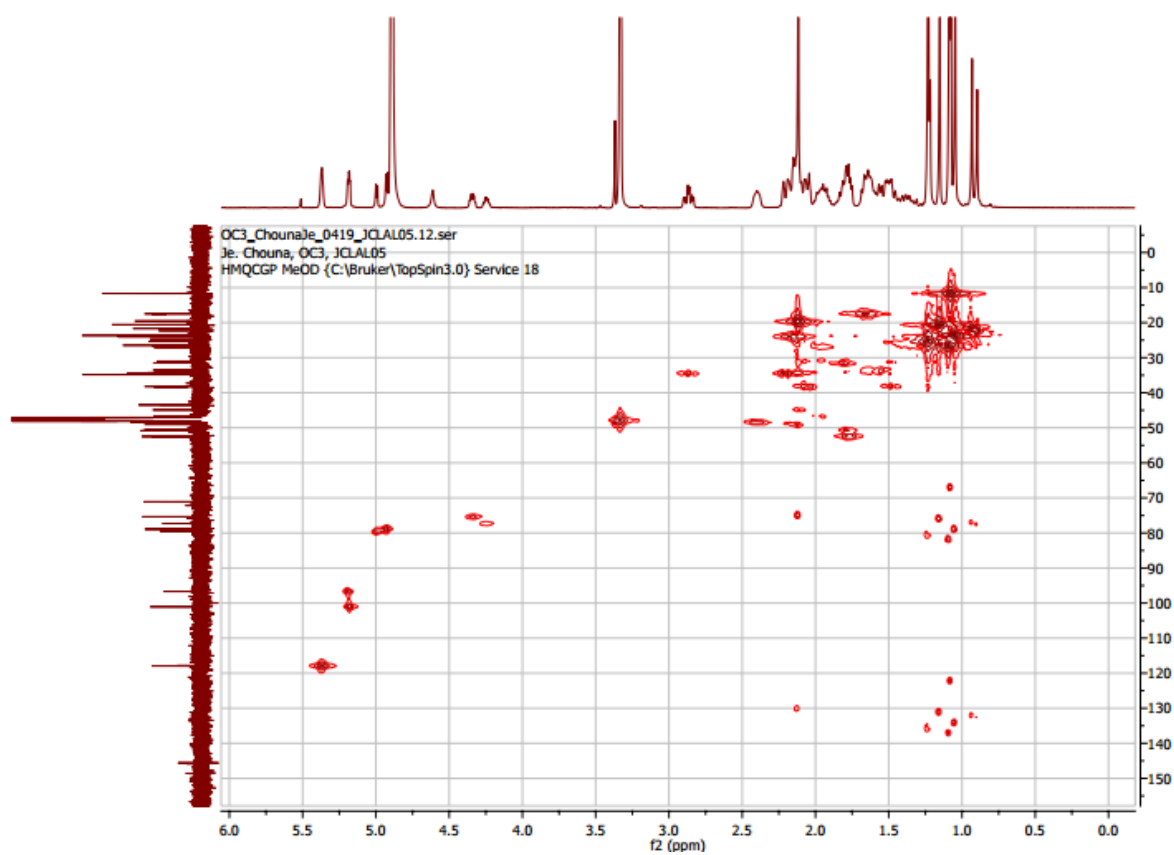

Figure S5. HSQC spectrum of compound **1**

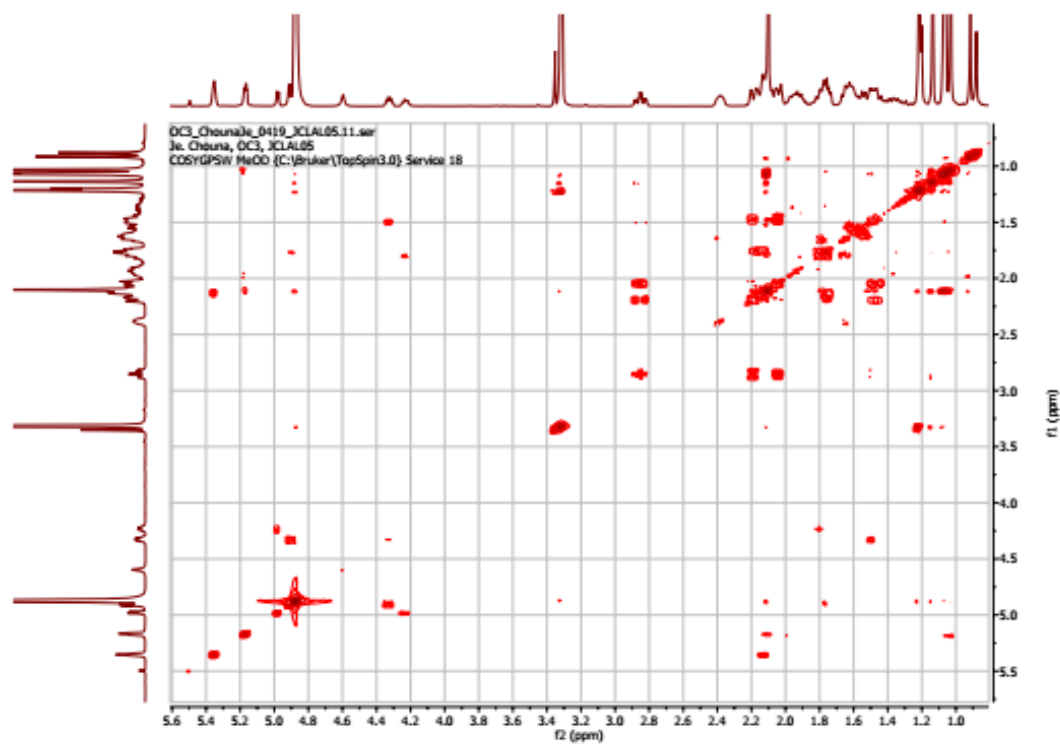

Figure S6.  $^1\text{H}$ - $^1\text{H}$  COSY spectrum of compound **1**

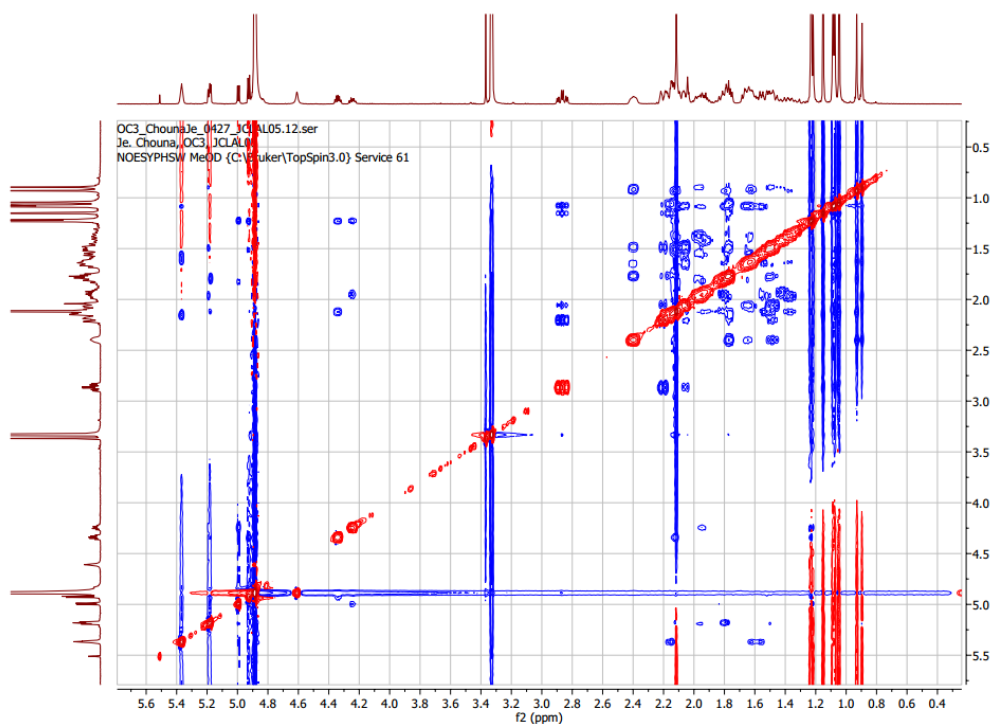

**Figure S7.**  $^1\text{H}$ - $^1\text{H}$  NOESY spectrum of compound **1**

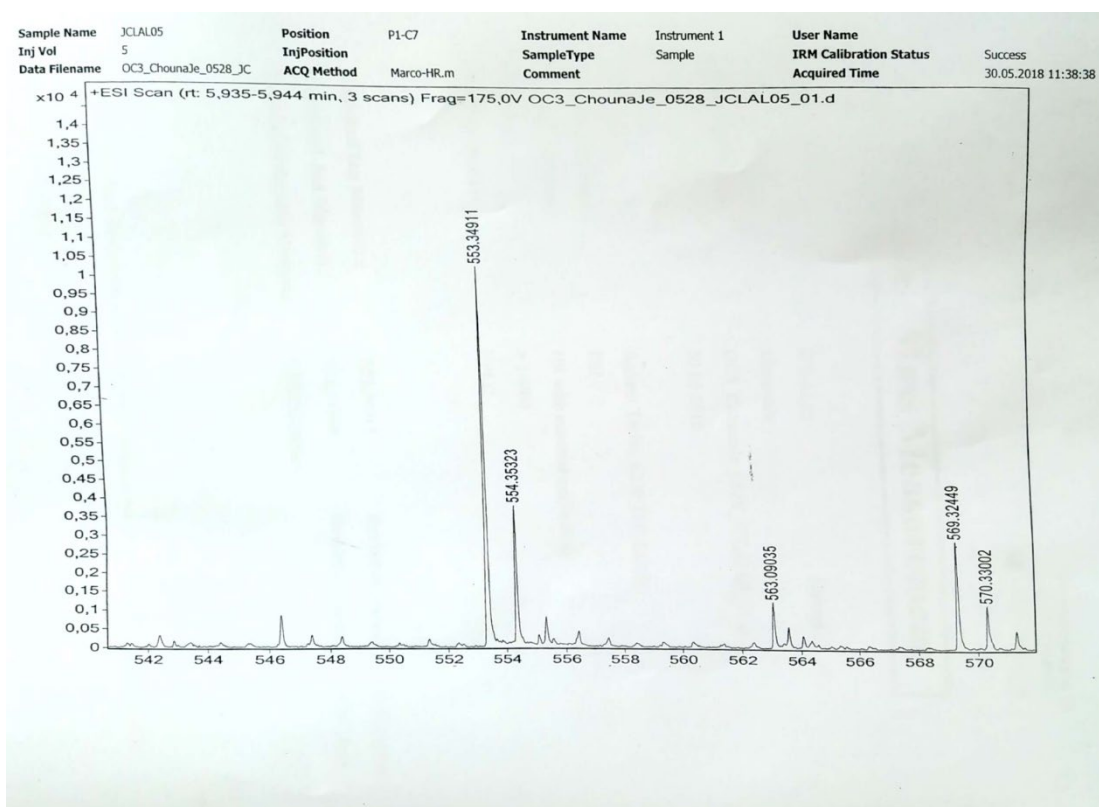

**Figure S8.** HRESIMS spectrum of  $[\text{M}+\text{Na}]^+$  ion of compound **1**

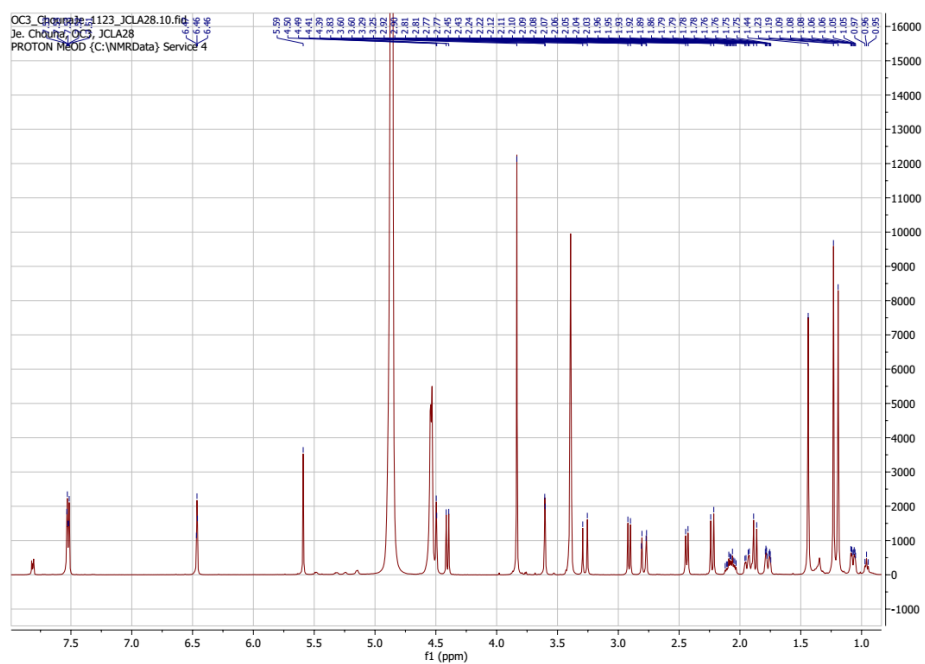

**Figure S9.**  $^1\text{H}$  NMR spectrum of compound **2**

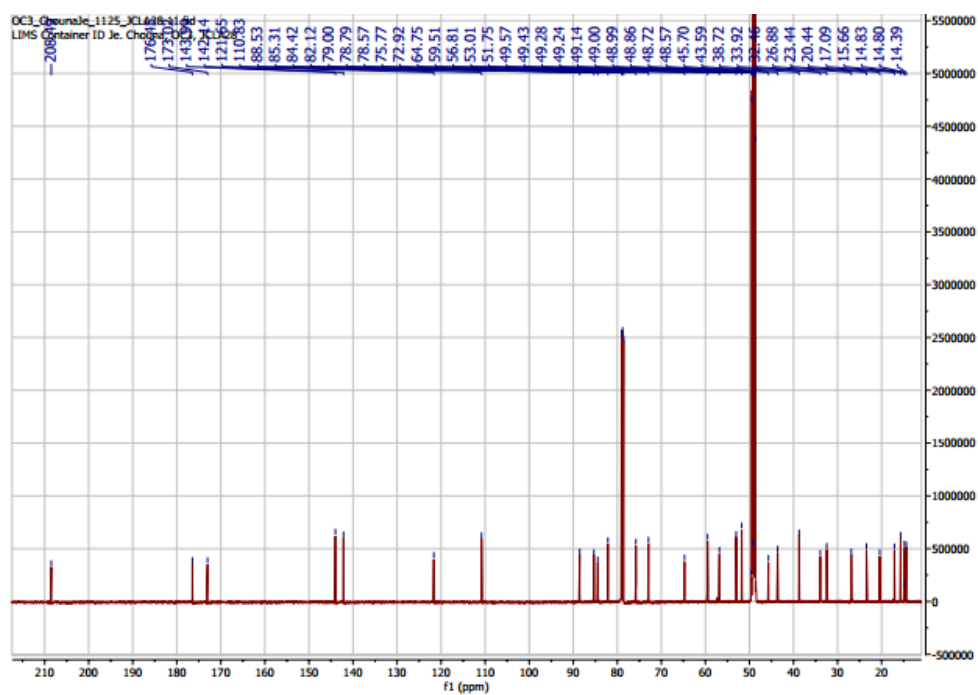

**Figure S10.**  $^{13}\text{C}$  NMR spectrum of compound **2**

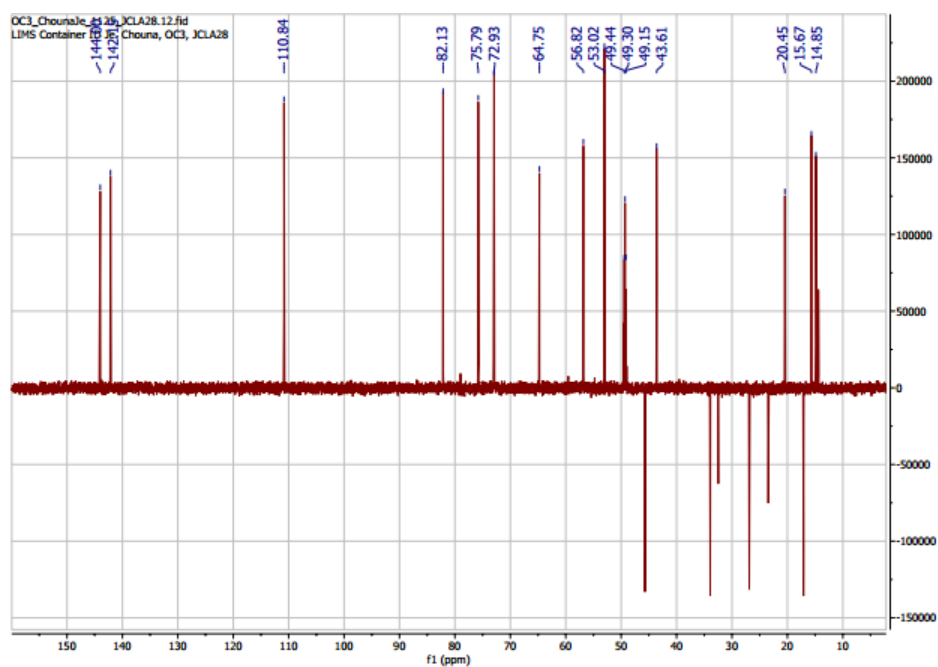

Figure S11. DEPT 135° spectra of compound 2

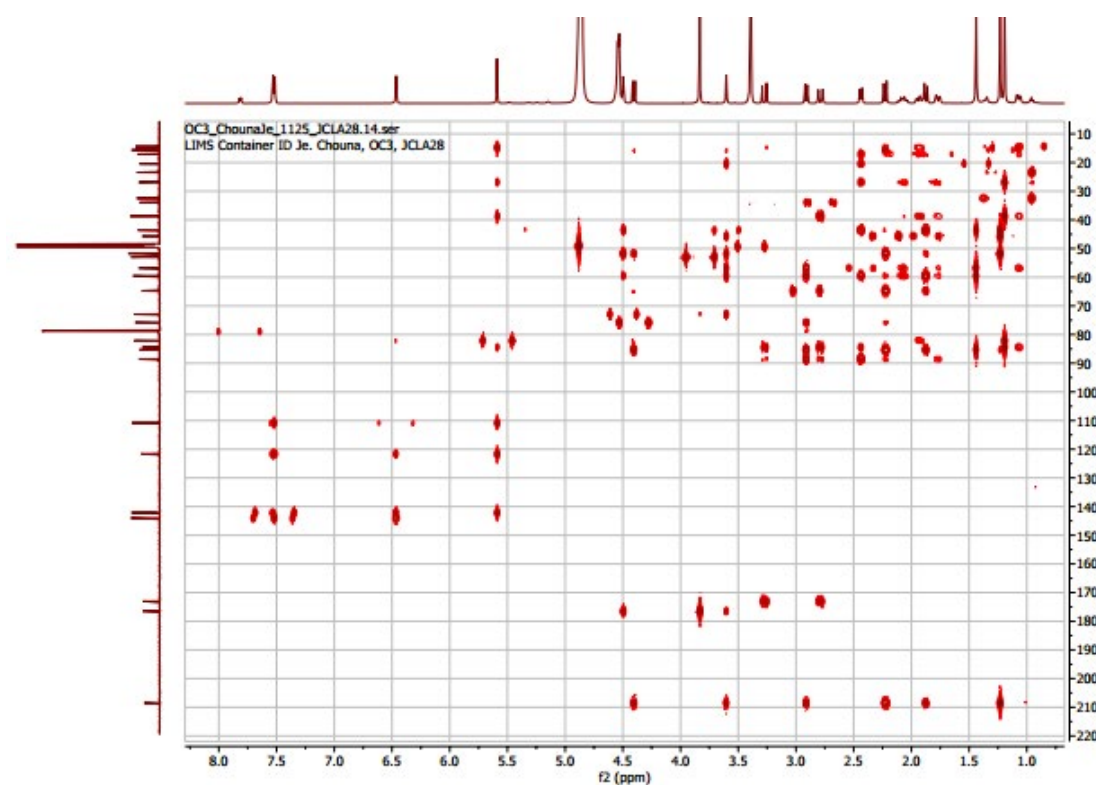

Figure S12. HMBC spectrum of compound 2

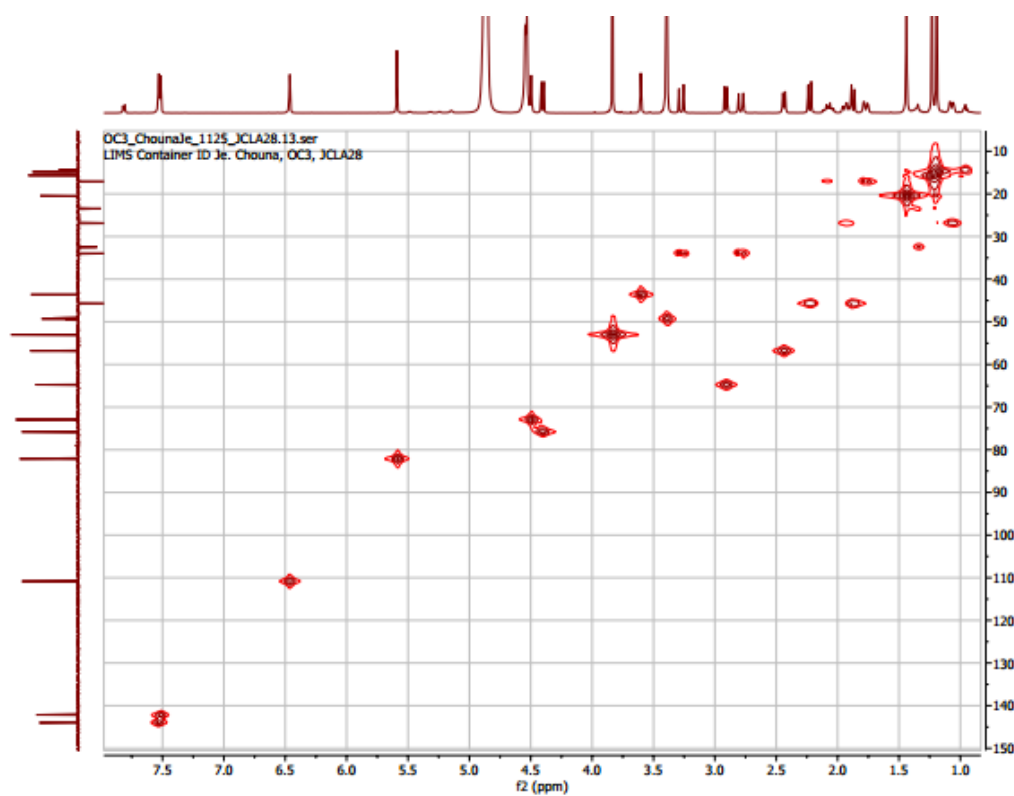

**Figure S13.** HSQC spectrum of compound **2**

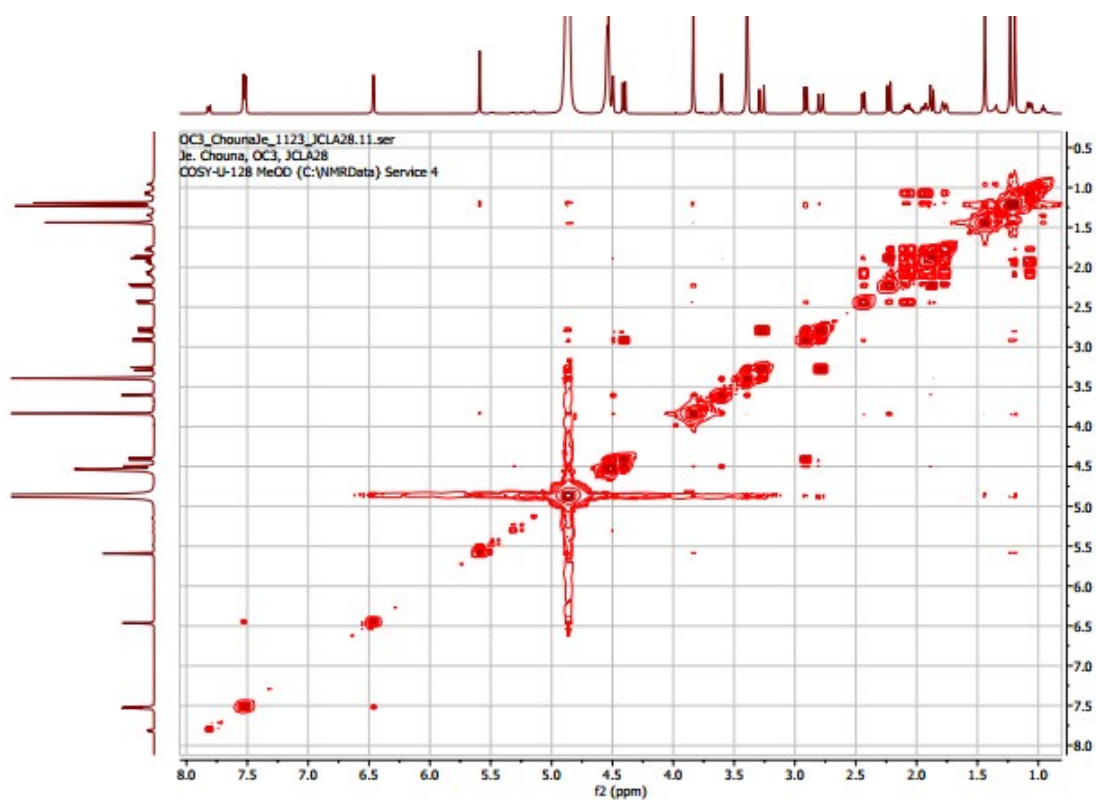

**Figure S14.**  $^1\text{H}$ - $^1\text{H}$  COSY spectrum of compound **2**



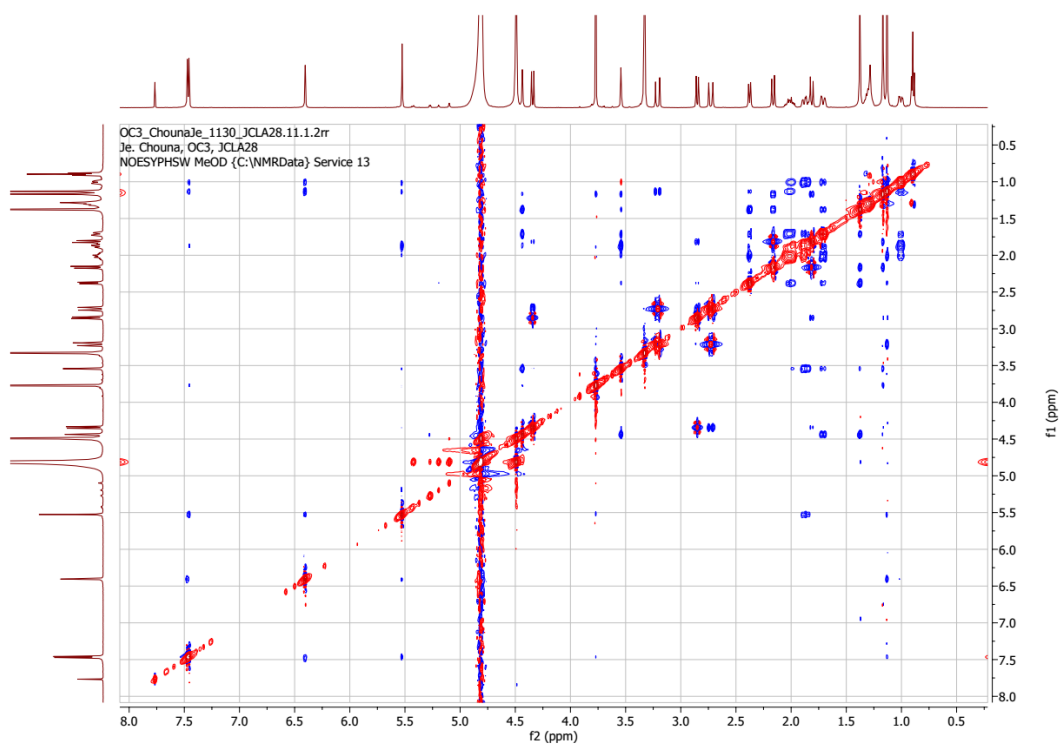

**Figure S15.** NOESY spectrum of compound **2**

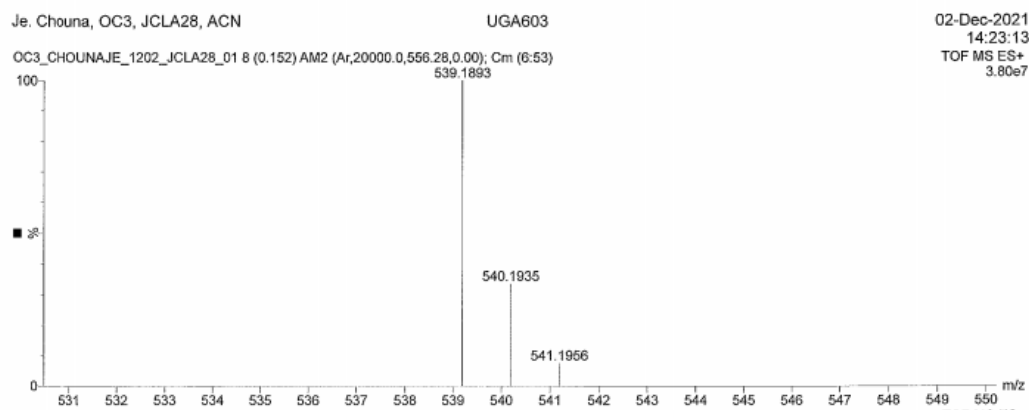

**Figure S16.** HRESIMS spectrum of  $[M+H]^+$  ion of compound **2**
